# Supplementary material for: Polo-like kinase 4 controls centriole duplication but does not directly regulate cytokinesis
Source: PubMed Central journal article supplement — Mol Biol Cell. 2012 May 15;23(10):1838–45. doi: 10.1091/mbc.E11-12-1043 (PMC3350549; doi:10.1091/mbc.e11-12-1043), 2012-05-15
Supplement: supp_E11-12-1043v1_CombinedSupMats.pdf [file supp_E11-12-1043v1_CombinedSupMats.pdf]

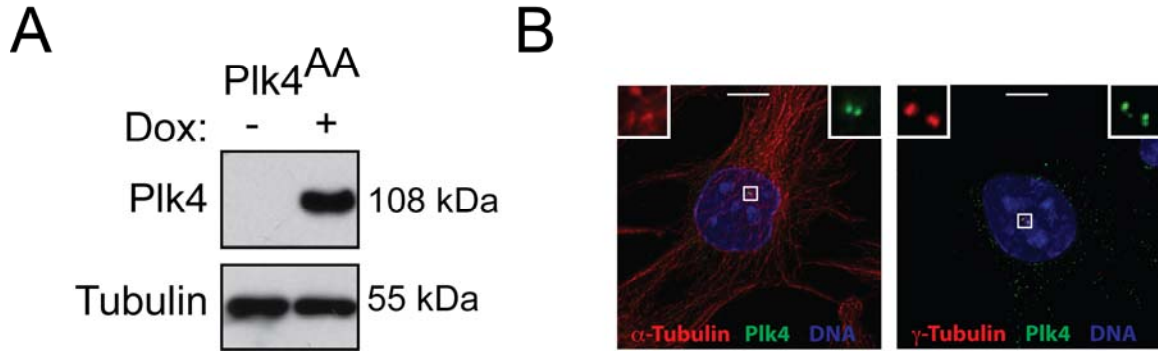

**Supplementary Figure 1.** Characterization of an antibody raised to Plk4. (A) Immunoblot of doxycycline (Dox) inducible Plk4<sup>AA</sup> RPE1 cells (Wang *et al.*, 2011). The Plk4 antibody detects overexpressed untagged Plk4<sup>AA</sup> transgene, but no endogenous Plk4 is detectable. (B) Representative immunofluorescence images of RPE1 cells stained with a Plk4 antibody. Red,  $\alpha$ -tubulin or  $\gamma$ -tubulin; Green, Plk4; Blue, DNA. Scale bar = 5  $\mu$ m.

**Supplementary Movie 1.** Normal mitotic division. Movie of RPE1<sup>+/-</sup> cell co-expressing EYFP- $\alpha$ -Tubulin and Histone H2B-mRFP undergoing normal mitotic chromosome segregation. Filming began two days after depletion of GAPDH with siRNA. Shown in Figure 5A. One frame captured every 5 minutes.

**Supplementary Movie 2.** Division with asymmetric mitotic spindle. Movie of RPE1<sup>+/-</sup> cell co-expressing EYFP- $\alpha$ -Tubulin and Histone H2B-mRFP dividing with an asymmetric mitotic spindle. Filming began two days after depletion of Plk4 with siRNA. Shown in Figure 5A. One frame captured every 4 minutes.

**Supplementary Movie 3.** Division with chromosome missegregation. Movie of RPE1<sup>+/-</sup> cell co-expressing EYFP- $\alpha$ -Tubulin and Histone H2B-mRFP dividing undergoing chromosome missegregation. Filming began two days after depletion of Plk4 with siRNA. Shown in Figure 5A. One frame captured every 4 minutes.

**Supplementary Movie 4.** Division with multi-polar mitotic spindle. Movie of RPE1<sup>+/-</sup> cell co-expressing EYFP- $\alpha$ -Tubulin and Histone H2B-mRFP dividing with a multi-polar mitotic spindle. Filming began two days after depletion of Plk4 with siRNA. Shown in Figure 5A. One frame captured every 4 minutes.
